# Supplementary material for: Assessing breast cancer cell lines as tumour models by comparison of mRNA expression profiles
Source: PubMed Central journal article supplement (PMC4545915; doi:10.1186/s13058-015-0613-0), 2015-08-20

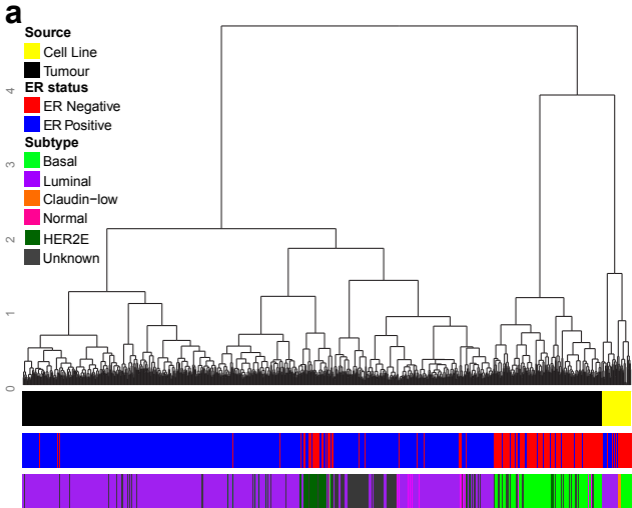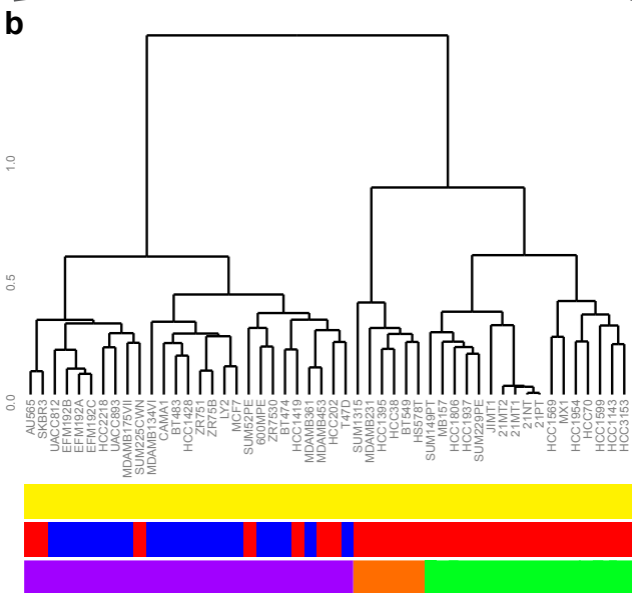

Supplement: 13058_2015_613_MOESM1_ESM.pdf [file 13058_2015_613_MOESM1_ESM.pdf]
